# Supplementary material for: Incidence of SARS-CoV-2 Infection and Related Mortality by Education Level during Three Phases of the 2020 Pandemic: A Population-Based Cohort Study in Rome
Source: MDPI journal article supplement (doi:10.3390/jcm11030877), 2022-02-07
Supplement: s1 [file s1]

# SUPPLEMENTARY MATERIAL

## SUMMARY

|                                                                                                                                                                                                         |   |
|---------------------------------------------------------------------------------------------------------------------------------------------------------------------------------------------------------|---|
| Table S1: SARS-CoV-2 infections by educational level, sex, and age. Crude cumulative incidence (CCI) with 95% CI and $\chi^2$ p-value for comparison. Rome, 35+ years old, 1-03-2020 to 31-12-2020..... | 2 |
| Table S2. Univariate and multivariable log-binomial regression model. RR, 95% CI and p-value. ....                                                                                                      | 4 |
| Table S3: Deaths within 30 days of infection by educational level, sex, and age. Crude mortality rate (CMR) with 95% CI and $\chi^2$ p-value. Rome, 35+ years old, 1-03-2020 to 31-12-2020. ....        | 6 |
| Table S4: Univariate and multivariable Cox regression model. HR, 95% CI and p-value.....                                                                                                                | 8 |

**Table S1:** SARS-CoV-2 infections by educational level, sex, and age. Crude cumulative incidence (CCI) with 95% CI and  $\chi^2$  p-value for comparison. Rome, 35+ years old, 1-03-2020 to 31-12-2020.

| ENTIRE PERIOD        |         |       |       |       |         |          |        |       |         |
|----------------------|---------|-------|-------|-------|---------|----------|--------|-------|---------|
| SARS-CoV-2 INFECTION |         |       |       |       |         |          |        |       |         |
|                      | No      |       | Yes   |       | All     | CCI*1000 | 95% CI |       | p-value |
|                      | N       | %     | N     | %     | N       |          |        |       |         |
|                      | 1490495 | 100   | 47736 | 100   | 1538231 |          |        |       |         |
|                      |         |       |       |       |         |          |        |       |         |
| EDUCATIONAL LEVEL    |         |       |       |       |         |          |        |       |         |
| Low                  | 610746  | 40.98 | 19999 | 41.9  | 630745  | 31.71    | 31.27  | 32.15 | <0.001  |
| Medium               | 538178  | 36.11 | 17707 | 37.09 | 555885  | 31.85    | 31.39  | 32.33 | <0.001  |
| High                 | 341571  | 22.92 | 10030 | 21.01 | 351601  | 28.53    | 27.97  | 29.09 |         |
| SEX                  |         |       |       |       |         |          |        |       |         |
| Male                 | 662069  | 44.42 | 22384 | 46.89 | 684453  | 32.70    | 32.28  | 33.13 | <0.001  |
| Female               | 828426  | 55.58 | 25352 | 53.11 | 853778  | 29.69    | 29.33  | 30.06 |         |
| AGE CLASSES          |         |       |       |       |         |          |        |       |         |
| 35-44                | 234567  | 15.74 | 8487  | 17.78 | 243054  | 34.92    | 34.18  | 35.67 | <0.001  |
| 45-54                | 364192  | 24.43 | 13653 | 28.6  | 377845  | 36.13    | 35.53  | 36.74 | <0.001  |
| 55-64                | 329347  | 22.1  | 11053 | 23.15 | 340400  | 32.47    | 31.87  | 33.08 | <0.001  |
| 65-74                | 260956  | 17.51 | 6276  | 13.15 | 267232  | 23.48    | 22.91  | 24.07 | <0.001  |
| 75-79                | 112803  | 7.57  | 2653  | 5.56  | 115456  | 22.98    | 22.12  | 23.87 | <0.001  |
| 80+                  | 188630  | 12.66 | 5614  | 11.76 | 194244  | 28.90    | 28.16  | 29.67 |         |
| MARCH-MAY            |         |       |       |       |         |          |        |       |         |
| SARS-CoV-2 INFECTION |         |       |       |       |         |          |        |       |         |
|                      | No      |       | Yes   |       | All     | CCI*1000 | 95% CI |       | p-value |
|                      | N       | %     | N     | %     | N       |          |        |       |         |
|                      | 1535446 | 100   | 2191  | 100   | 1537637 |          |        |       |         |
|                      |         |       |       |       |         |          |        |       |         |
| EDUCATIONAL LEVEL    | 629342  | 40.99 | 995   | 45.41 | 630337  |          |        |       |         |
| Low                  |         |       |       |       |         | 1.58     | 1.48   | 1.68  | <0.001  |
| Medium               | 555158  | 36.16 | 603   | 27.52 | 555761  | 1.08     | 1.00   | 1.18  | <0.001  |
| High                 | 350946  | 22.86 | 593   | 27.07 | 351539  | 1.69     | 1.56   | 1.83  |         |
| SEX                  |         |       |       |       |         |          |        |       |         |
| Male                 | 683062  | 44.49 | 1089  | 49.7  | 684151  | 1.59     | 1.50   | 1.69  | <0.001  |
| Female               | 852384  | 55.51 | 1102  | 50.3  | 853486  | 1.29     | 1.22   | 1.37  |         |
| AGE CLASSES          |         |       |       |       |         |          |        |       |         |
| 35-44                | 242858  | 15.82 | 195   | 8.9   | 243053  |          |        |       |         |
|                      |         |       |       |       |         | 0.80     | 0.70   | 0.92  | <0.001  |
| 45-54                | 377417  | 24.58 | 417   | 19.03 | 377834  | 1.10     | 1.00   | 1.21  | <0.001  |
| 55-64                | 339917  | 22.14 | 440   | 20.08 | 340357  | 1.29     | 1.18   | 1.42  | <0.001  |
| 65-74                | 266762  | 17.37 | 357   | 16.29 | 267119  | 1.34     | 1.20   | 1.48  | <0.001  |
| 75-79                | 115176  | 7.5   | 192   | 8.76  | 115368  | 1.66     | 1.44   | 1.92  | <0.001  |
| 80+                  | 193316  | 12.59 | 590   | 26.93 | 193906  | 3.04     | 2.81   | 3.30  |         |
| JUNE-AUGUST          |         |       |       |       |         |          |        |       |         |
| SARS-CoV-2 INFECTION |         |       |       |       |         |          |        |       |         |
|                      | No      |       | Yes   |       | All     | CCI*1000 | 95% CI |       | p-value |
|                      | N       | %     | N     | %     | N       |          |        |       |         |
|                      | 1536365 | 100   | 849   | 100   | 1537214 |          |        |       |         |
|                      |         |       |       |       |         | 0.55     | 0.52   | 0.59  |         |

|                          |        |       |     |       |        |      |      |      |        |
|--------------------------|--------|-------|-----|-------|--------|------|------|------|--------|
| <b>EDUCATIONAL LEVEL</b> | 629705 | 40.99 | 327 | 38.52 | 630032 |      |      |      |        |
| <b>Low</b>               |        |       |     |       |        | 0.52 | 0.47 | 0.58 | <0.001 |
| <b>Medium</b>            | 555373 | 36.15 | 320 | 37.69 | 555693 | 0.58 | 0.52 | 0.64 | <0.001 |
| <b>High</b>              | 351287 | 22.86 | 202 | 23.79 | 351489 | 0.57 | 0.50 | 0.66 |        |
| <b>SEX</b>               |        |       |     |       |        |      |      |      |        |
| <b>Male</b>              | 683500 | 44.49 | 422 | 49.71 | 683922 | 0.62 | 0.56 | 0.68 | <0.001 |
| <b>Female</b>            | 852865 | 55.51 | 427 | 50.29 | 853292 | 0.50 | 0.46 | 0.55 |        |
| <b>AGE CLASSES</b>       |        |       |     |       |        |      |      |      |        |
| <b>35-44</b>             | 242885 | 15.81 | 166 | 19.55 | 243051 | 0.68 | 0.59 | 0.80 | <0.001 |
| <b>45-54</b>             | 377567 | 24.58 | 260 | 30.62 | 377827 | 0.69 | 0.61 | 0.78 | <0.001 |
| <b>55-64</b>             | 340152 | 22.14 | 182 | 21.44 | 340334 | 0.53 | 0.46 | 0.62 | <0.001 |
| <b>65-74</b>             | 266956 | 17.38 | 96  | 11.31 | 267052 | 0.36 | 0.29 | 0.44 | <0.001 |
| <b>75-79</b>             | 115265 | 7.5   | 47  | 5.54  | 115312 | 0.41 | 0.31 | 0.54 | <0.001 |
| <b>80+</b>               | 193540 | 12.6  | 98  | 11.54 | 193638 | 0.51 | 0.42 | 0.62 |        |

#### SEPTEMBER-DECEMBER

| SARS-CoV-2 INFECTION |         |       |       |       |         |          |        |       |         |
|----------------------|---------|-------|-------|-------|---------|----------|--------|-------|---------|
|                      | No      |       | Yes   |       | All     | CCI*1000 | 95% CI |       | p-value |
|                      | N       | %     | N     | %     | N       |          |        |       |         |
|                      | 1493004 | 100   | 44093 | 100   | 1537097 |          |        |       |         |
| EDUCATIONAL LEVEL    | 611681  | 40.97 | 18261 | 41.41 | 629942  |          |        |       |         |
| Low                  |         |       |       |       |         | 28.99    | 28.57  | 29.41 | <0.001  |
| Medium               | 539016  | 36.1  | 16659 | 37.78 | 555675  | 29.98    | 29.53  | 30.44 | <0.001  |
| High                 | 342307  | 22.93 | 9173  | 20.8  | 351480  | 26.10    | 25.57  | 26.64 |         |
| SEX                  | 663311  | 44.43 | 20566 | 46.64 | 683877  |          |        |       |         |
| Male                 |         |       |       |       |         | 30.07    | 29.66  | 30.49 | <0.001  |
| Female               | 829693  | 55.57 | 23527 | 53.36 | 853220  | 27.57    | 27.23  | 27.93 |         |
| AGE CLASSES          | 234926  | 15.74 | 8125  | 18.43 | 243051  |          |        |       |         |
| 35-44                |         |       |       |       |         | 33.43    | 32.71  | 34.16 | <0.001  |
| 45-54                | 364861  | 24.44 | 12965 | 29.4  | 377826  | 34.31    | 33.73  | 34.91 | <0.001  |
| 55-64                | 329945  | 22.1  | 10388 | 23.56 | 340333  | 30.52    | 29.94  | 31.12 | <0.001  |
| 65-74                | 261319  | 17.5  | 5708  | 12.95 | 267027  | 21.38    | 20.83  | 21.94 | <0.001  |
| 75-79                | 112972  | 7.57  | 2325  | 5.27  | 115297  | 20.17    | 19.36  | 21.00 | <0.001  |
| 80+                  | 188981  | 12.66 | 4582  | 10.39 | 193563  | 23.67    | 23.00  | 24.37 |         |

\* $\chi^2$  p-value after Bonferroni adjustment for multiple comparison.

**Table S2.** Univariate and multivariable log-binomial regression model. RR, 95% CI and p-value.

| ENTIRE PERIOD            |                     |        |         |        |                   |        |         |        |
|--------------------------|---------------------|--------|---------|--------|-------------------|--------|---------|--------|
|                          | Unadjusted analysis |        |         |        | Adjusted analysis |        |         |        |
|                          | RR                  | 95% CI | p-value |        | RR                | 95% CI | p-value |        |
| <b>EDUCATIONAL LEVEL</b> |                     |        |         |        |                   |        |         |        |
| <b>Low</b>               | 1.11                | 1.09   | 1.14    | <.0001 | 1.23              | 1.20   | 1.26    | <.0001 |
| <b>Medium</b>            | 1.12                | 1.09   | 1.14    | <.0001 | 1.12              | 1.09   | 1.15    | <.0001 |
| <b>High</b>              | 1.00                |        |         |        | 1.00              |        |         |        |
| <b>SEX</b>               |                     |        |         |        |                   |        |         |        |
| <b>Male</b>              | 1.10                | 1.08   | 1.11    | <.0001 | 1.09              | 1.07   | 1.11    | <.0001 |
| <b>Female</b>            | 1.00                |        |         |        | 1.00              |        |         |        |
| <b>AGE CLASSES</b>       |                     |        |         |        |                   |        |         |        |
| <b>35-44</b>             | 1.11                | 1.07   | 1.14    | <.0001 | 1.28              | 1.24   | 1.33    | <.0001 |
| <b>45-54</b>             | 1.17                | 1.14   | 1.20    | <.0001 | 1.31              | 1.27   | 1.35    | <.0001 |
| <b>55-64</b>             | 1.07                | 1.04   | 1.10    | <.0001 | 1.17              | 1.13   | 1.20    | <.0001 |
| <b>65-74</b>             | 0.79                | 0.76   | 0.82    | <.0001 | 0.83              | 0.80   | 0.86    | <.0001 |
| <b>75-79</b>             | 0.79                | 0.76   | 0.83    | <.0001 | 0.80              | 0.77   | 0.84    | <.0001 |
| <b>80+</b>               | 1.00                |        |         |        | 1.00              |        |         |        |
| MARCH-MAY                |                     |        |         |        |                   |        |         |        |
|                          | Unadjusted analysis |        |         |        | Adjusted analysis |        |         |        |
|                          | RR                  | 95% CI | p-value |        | RR                | 95% CI | p-value |        |
| <b>EDUCATIONAL LEVEL</b> |                     |        |         |        |                   |        |         |        |
| <b>Low</b>               | 0.94                | 0.85   | 1.04    | 0.2003 | 0.71              | 0.64   | 0.79    | <.0001 |
| <b>Medium</b>            | 0.64                | 0.57   | 0.72    | <.0001 | 0.64              | 0.57   | 0.71    | <.0001 |
| <b>High</b>              | 1.00                |        |         |        | 1.00              |        |         |        |
| <b>SEX</b>               |                     |        |         |        |                   |        |         |        |
| <b>Male</b>              | 1.21                | 1.12   | 1.31    | <.0001 | 1.29              | 1.19   | 1.41    | <.0001 |
| <b>Female</b>            | 1.00                |        |         |        | 1.00              |        |         |        |
| <b>AGE CLASSES</b>       |                     |        |         |        |                   |        |         |        |
| <b>35-44</b>             | 0.27                | 0.24   | 0.31    | <.0001 | 0.24              | 0.21   | 0.29    | <.0001 |
| <b>45-54</b>             | 0.35                | 0.31   | 0.39    | <.0001 | 0.34              | 0.30   | 0.39    | <.0001 |
| <b>55-64</b>             | 0.42                | 0.38   | 0.48    | <.0001 | 0.41              | 0.36   | 0.46    | <.0001 |
| <b>65-74</b>             | 0.44                | 0.39   | 0.50    | <.0001 | 0.42              | 0.37   | 0.48    | <.0001 |
| <b>75-79</b>             | 0.56                | 0.48   | 0.65    | <.0001 | 0.54              | 0.45   | 0.63    | <.0001 |
| <b>80+</b>               | 1.00                |        |         |        | 1.00              |        |         |        |
| JUNE-AUGUST              |                     |        |         |        |                   |        |         |        |
|                          | Unadjusted analysis |        |         |        | Adjusted analysis |        |         |        |
|                          | RR                  | 95% CI | p-value |        | RR                | 95% CI | p-value |        |
| <b>EDUCATIONAL LEVEL</b> |                     |        |         |        |                   |        |         |        |
| <b>Low</b>               | 0.90                | 0.76   | 1.08    | 0.2547 | 1.02              | 0.85   | 1.22    | 0.8492 |
| <b>Medium</b>            | 1.00                | 0.84   | 1.19    | 0.9821 | 1.01              | 0.85   | 1.21    | 0.9071 |
| <b>High</b>              | 1.00                |        |         |        | 1.00              |        |         |        |
| <b>SEX</b>               |                     |        |         |        |                   |        |         |        |
| <b>Male</b>              | 1.24                | 1.10   | 1.40    | 0.0005 | 1.22              | 1.06   | 1.39    | 0.0044 |
| <b>Female</b>            | 1.00                |        |         |        | 1.00              |        |         |        |
| <b>AGE CLASSES</b>       |                     |        |         |        |                   |        |         |        |
| <b>35-44</b>             | 1.47                | 1.17   | 1.85    | 0.0008 | 1.33              | 1.03   | 1.72    | 0.0318 |
| <b>45-54</b>             | 1.39                | 1.11   | 1.73    | 0.0035 | 1.34              | 1.05   | 1.70    | 0.017  |
| <b>55-64</b>             | 1.07                | 0.84   | 1.35    | 0.5865 | 1.04              | 0.81   | 1.34    | 0.7529 |

|                           |                            |               |      |                |                          |               |      |                |
|---------------------------|----------------------------|---------------|------|----------------|--------------------------|---------------|------|----------------|
| <b>65-74</b>              | 0.71                       | 0.54          | 0.93 | 0.0142         | 0.70                     | 0.53          | 0.93 | 0.0143         |
| <b>75-79</b>              | 0.83                       | 0.59          | 1.15 | 0.2609         | 0.80                     | 0.56          | 1.13 | 0.2036         |
| <b>80+</b>                | 1.00                       |               |      |                | 1.00                     |               |      |                |
| <b>SEPTEMBER-DECEMBER</b> |                            |               |      |                |                          |               |      |                |
|                           | <b>Unadjusted analysis</b> |               |      |                | <b>Adjusted analysis</b> |               |      |                |
|                           | <b>RR</b>                  | <b>95% CI</b> |      | <b>p-value</b> | <b>RR</b>                | <b>95% CI</b> |      | <b>p-value</b> |
| <b>EDUCATIONAL LEVEL</b>  |                            |               |      |                |                          |               |      |                |
| <b>Low</b>                | 1.11                       | 1.08          | 1.14 | <.0001         | 1.27                     | 1.23          | 1.30 | <.0001         |
| <b>Medium</b>             | 1.15                       | 1.12          | 1.18 | <.0001         | 1.15                     | 1.13          | 1.18 | <.0001         |
| <b>High</b>               | 1.00                       |               |      |                | 1.00                     |               |      |                |
| <b>SEX</b>                |                            |               |      |                |                          |               |      |                |
| <b>Male</b>               | 1.08                       | 1.07          | 1.10 | <.0001         | 1.07                     | 1.05          | 1.09 | <.0001         |
| <b>Female</b>             | 1.00                       |               |      |                | 1.00                     |               |      |                |
| <b>AGE CLASSES</b>        |                            |               |      |                |                          |               |      |                |
| <b>35-44</b>              | 1.28                       | 1.24          | 1.33 | <.0001         | 1.51                     | 1.46          | 1.57 | <.0001         |
| <b>45-54</b>              | 1.35                       | 1.31          | 1.39 | <.0001         | 1.53                     | 1.48          | 1.59 | <.0001         |
| <b>55-64</b>              | 1.22                       | 1.18          | 1.26 | <.0001         | 1.34                     | 1.30          | 1.39 | <.0001         |
| <b>65-74</b>              | 0.87                       | 0.84          | 0.91 | <.0001         | 0.93                     | 0.89          | 0.96 | 0.0002         |
| <b>75-79</b>              | 0.85                       | 0.81          | 0.89 | <.0001         | 0.86                     | 0.82          | 0.90 | <.0001         |
| <b>80+</b>                | 1.00                       |               |      |                | 1.00                     |               |      |                |

\*Adjusted for age and sex. p-value after Bonferroni adjustment for multiple comparison.

**Table S3:** Deaths within 30 days of infection by educational level, sex, and age. Crude mortality rate (CMR) with 95% CI and  $\chi^2$  p-value. Rome, 35+ years old, 1-03-2020 to 31-12-2020.

| ENTIRE PERIOD                    |       |       |      |       |       |          |        |        |         |
|----------------------------------|-------|-------|------|-------|-------|----------|--------|--------|---------|
| Dead within 30 days of infection |       |       |      |       |       |          |        |        |         |
|                                  | No    |       | Yes  |       | All   | CMR*1000 | 95% CI |        | p-value |
|                                  | N     | %     | N    | %     | N     |          |        |        |         |
|                                  | 45455 | 100   | 2281 | 100   | 47736 | 47.78    | 45.86  | 49.79  |         |
| <b>EDUCATIONAL LEVEL</b>         |       |       |      |       |       |          |        |        |         |
| Low                              | 18385 | 40.45 | 1614 | 70.76 | 19999 | 80.70    | 76.86  | 84.74  | <0.001  |
| Medium                           | 17269 | 37.99 | 438  | 19.2  | 17707 | 24.74    | 22.53  | 27.17  | <0.001  |
| High                             | 9801  | 21.56 | 229  | 10.04 | 10030 | 22.83    | 20.06  | 25.99  |         |
| <b>SEX</b>                       |       |       |      |       |       |          |        |        |         |
| Male                             | 21100 | 46.42 | 1284 | 56.29 | 22384 | 57.36    | 54.31  | 60.59  | <0.001  |
| Female                           | 24355 | 53.58 | 997  | 43.71 | 25352 | 39.32    | 36.96  | 41.84  |         |
| <b>AGE CLASSES</b>               |       |       |      |       |       |          |        |        |         |
| 35-44                            | 8477  | 18.65 | 10   | 0.44  | 8487  | 1.18     | 0.63   | 2.19   | <0.001  |
| 45-54                            | 13605 | 29.93 | 48   | 2.1   | 13653 | 3.52     | 2.65   | 4.67   | <0.001  |
| 55-64                            | 10911 | 24    | 142  | 6.23  | 11053 | 12.85    | 10.90  | 15.14  | <0.001  |
| 65-74                            | 5865  | 12.9  | 411  | 18.02 | 6276  | 65.49    | 59.45  | 72.14  | <0.001  |
| 75-79                            | 2308  | 5.08  | 345  | 15.12 | 2653  | 130.04   | 117.02 | 144.51 | <0.001  |
| 80+                              | 4289  | 9.44  | 1325 | 58.09 | 5614  | 236.03   | 223.64 | 249.08 |         |
| <b>MARCH-MAY</b>                 |       |       |      |       |       |          |        |        |         |
| Dead within 30 days of infection |       |       |      |       |       |          |        |        |         |
|                                  | No    |       | Yes  |       | All   | CMR*1000 | 95% CI |        | p-value |
|                                  | N     | %     | N    | %     | N     |          |        |        |         |
|                                  | 1847  | 100   | 344  | 100   | 2191  | 157.00   | 141.27 | 174.51 |         |
| <b>EDUCATIONAL LEVEL</b>         |       |       |      |       |       |          |        |        |         |
| Low                              | 750   | 40.61 | 245  | 71.22 | 995   | 246.23   | 217.25 | 279.07 | <0.001  |
| Medium                           | 549   | 29.72 | 44   | 12.79 | 593   | 91.21    | 70.03  | 118.80 | <0.001  |
| High                             | 548   | 29.67 | 55   | 15.99 | 603   | 74.20    | 55.22  | 99.71  |         |
| <b>SEX</b>                       |       |       |      |       |       |          |        |        |         |
| Male                             | 951   | 51.49 | 151  | 43.9  | 1102  | 177.23   | 153.91 | 204.09 | <0.001  |
| Female                           | 896   | 48.51 | 193  | 56.1  | 1089  | 137.02   | 116.82 | 160.72 |         |
| <b>AGE CLASSES</b>               |       |       |      |       |       |          |        |        |         |
| 35-44                            | 193   | 10.45 | 2    | 0.58  | 195   | 10.26    | 2.56   | 41.01  | <0.001  |
| 45-54                            | 410   | 22.2  | 7    | 2.03  | 417   | 16.79    | 8.00   | 35.21  | <0.001  |
| 55-64                            | 423   | 22.9  | 17   | 4.94  | 440   | 38.63    | 24.02  | 62.15  | <0.001  |
| 65-74                            | 305   | 16.51 | 52   | 15.12 | 357   | 145.66   | 110.99 | 191.15 | <0.001  |
| 75-79                            | 142   | 7.69  | 50   | 14.53 | 192   | 260.41   | 197.37 | 343.59 | <0.001  |
| 80+                              | 374   | 20.25 | 216  | 62.79 | 590   | 366.12   | 320.40 | 418.32 |         |
| <b>JUNE-AUGUST</b>               |       |       |      |       |       |          |        |        |         |
| Dead within 30 days of infection |       |       |      |       |       |          |        |        |         |
|                                  | No    |       | Yes  |       | All   | CMR*1000 | 95% CI |        | p-value |
|                                  | N     | %     | N    | %     | N     |          |        |        |         |
|                                  | 814   | 100   | 35   | 100   | 849   | 41.23    | 29.60  | 57.42  |         |

|                          |     |       |    |       |     |        |        |        |        |
|--------------------------|-----|-------|----|-------|-----|--------|--------|--------|--------|
| <b>EDUCATIONAL LEVEL</b> |     |       |    |       |     |        |        |        |        |
| <b>Low</b>               | 301 | 36.98 | 26 | 74.29 | 327 | 79.51  | 54.14  | 116.78 | <0.001 |
| <b>Medium</b>            | 199 | 24.45 | 3  | 8.57  | 202 | 18.75  | 8.42   | 41.74  | <0.001 |
| <b>High</b>              | 314 | 38.57 | 6  | 17.14 | 320 | 14.85  | 4.79   | 46.05  |        |
| <b>SEX</b>               |     |       |    |       |     |        |        |        |        |
| <b>Male</b>              | 406 | 49.75 | 23 | 65.71 | 429 | 28.44  | 16.15  | 50.07  | <0.001 |
| <b>Female</b>            | 410 | 50.25 | 12 | 34.29 | 422 | 53.86  | 35.79  | 81.06  |        |
| <b>AGE CLASSES</b>       |     |       |    |       |     |        |        |        |        |
| <b>35-44</b>             | 166 | 20.39 | .  | .     | 166 | .      | .      | .      | <0.001 |
| <b>45-54</b>             | 259 | 31.82 | 1  | 2.86  | 260 | 3.85   | 0.54   | 27.30  | <0.001 |
| <b>55-64</b>             | 182 | 22.36 | .  | .     | 182 | .      | .      | .      | <0.001 |
| <b>65-74</b>             | 92  | 11.3  | 4  | 11.43 | 96  | 41.66  | 15.64  | 111.01 | <0.001 |
| <b>75-79</b>             | 42  | 5.16  | 5  | 14.29 | 47  | 106.38 | 44.28  | 255.59 | <0.001 |
| <b>80+</b>               | 73  | 8.97  | 25 | 71.43 | 98  | 255.10 | 172.37 | 377.53 |        |

#### SEPTEMBER-DECEMBER

| <b>Dead within 30 days of infection</b> |              |            |             |            |              |                 |               |              |                |
|-----------------------------------------|--------------|------------|-------------|------------|--------------|-----------------|---------------|--------------|----------------|
|                                         | <b>No</b>    |            | <b>Yes</b>  |            | <b>All</b>   | <b>CMR*1000</b> | <b>95% CI</b> |              | <b>p-value</b> |
|                                         | <b>N</b>     | <b>%</b>   | <b>N</b>    | <b>%</b>   | <b>N</b>     |                 |               |              |                |
|                                         | <b>42431</b> | <b>100</b> | <b>1662</b> | <b>100</b> | <b>44093</b> | <b>37.69</b>    | <b>35.92</b>  | <b>39.55</b> |                |
| <b>EDUCATIONAL LEVEL</b>                |              |            |             |            |              |                 |               |              |                |
| <b>Low</b>                              | 17083        | 40.26      | 1178        | 70.88      | 18261        | 64.51           | 60.93         | 68.30        | <0.001         |
| <b>Medium</b>                           | 9013         | 21.24      | 160         | 9.63       | 9173         | 19.45           | 17.44         | 21.69        | <0.001         |
| <b>High</b>                             | 16335        | 38.5       | 324         | 19.49      | 16659        | 17.44           | 14.94         | 20.37        |                |
| <b>SEX</b>                              |              |            |             |            |              |                 |               |              |                |
| <b>Male</b>                             | 22801        | 53.74      | 726         | 43.68      | 23527        | 45.51           | 42.69         | 48.52        | <0.001         |
| <b>Female</b>                           | 19630        | 46.26      | 936         | 56.32      | 20566        | 30.86           | 28.69         | 33.19        |                |
| <b>AGE CLASSES</b>                      |              |            |             |            |              |                 |               |              |                |
| <b>35-44</b>                            | 8117         | 19.13      | 8           | 0.48       | 8125         | 0.98            | 0.49          | 1.97         | <0.001         |
| <b>45-54</b>                            | 12927        | 30.47      | 38          | 2.29       | 12965        | 2.93            | 2.13          | 4.03         | <0.001         |
| <b>55-64</b>                            | 10279        | 24.23      | 109         | 6.56       | 10388        | 10.49           | 8.70          | 12.66        | <0.001         |
| <b>65-74</b>                            | 5403         | 12.73      | 305         | 18.35      | 5708         | 53.43           | 47.76         | 59.78        | <0.001         |
| <b>75-79</b>                            | 2081         | 4.9        | 244         | 14.68      | 2325         | 104.95          | 92.57         | 118.98       | <0.001         |
| <b>80+</b>                              | 3624         | 8.54       | 958         | 57.64      | 4582         | 209.09          | 196.24        | 222.75       |                |

\* $\chi^2$  p-value after Bonferroni adjustment for multiple comparison.

**Table S4:** Univariate and multivariable Cox regression model. HR, 95% CI and p-value.

| ENTIRE PERIOD       |       |        |       |         |                   |        |      |         |
|---------------------|-------|--------|-------|---------|-------------------|--------|------|---------|
| Unadjusted analysis |       |        |       |         | Adjusted analysis |        |      |         |
|                     | HR    | 95% CI |       | p-value | HR                | 95% CI |      | p-value |
| EDUCATIONAL LEVEL   |       |        |       |         |                   |        |      |         |
| Low                 | 3.64  | 3.17   | 4.18  | <.0001  | 1.37              | 1.19   | 1.58 | <.0001  |
| Medium              | 1.08  | 0.92   | 1.27  | 0.3292  | 1.14              | 0.97   | 1.33 | 0.1197  |
| High                | 1.00  |        |       |         | 1.00              |        |      |         |
| SEX                 |       |        |       |         |                   |        |      |         |
| Male                | 1.47  | 1.35   | 1.60  | <.0001  | 1.95              | 1.79   | 2.12 | <.0001  |
| Female              | 1.00  |        |       |         | 1.00              |        |      |         |
| AGE CLASSES         |       |        |       |         |                   |        |      |         |
| 35-44               | 0.004 | 0.002  | 0.008 | <.0001  | 0.01              | 0.00   | 0.01 | <.0001  |
| 45-54               | 0.013 | 0.010  | 0.017 | <.0001  | 0.01              | 0.01   | 0.02 | <.0001  |
| 55-64               | 0.048 | 0.040  | 0.057 | <.0001  | 0.05              | 0.04   | 0.06 | <.0001  |
| 65-74               | 0.250 | 0.223  | 0.279 | <.0001  | 0.23              | 0.21   | 0.26 | <.0001  |
| 75-79               | 0.512 | 0.455  | 0.576 | <.0001  | 0.48              | 0.42   | 0.54 | <.0001  |
| 80+                 | 1.00  |        |       |         | 1.00              |        |      |         |
| MARCH-MAY           |       |        |       |         |                   |        |      |         |
| Unadjusted analysis |       |        |       |         | Adjusted analysis |        |      |         |
|                     | HR    | 95% CI |       | p-value | HR                | 95% CI |      | p-value |
| EDUCATIONAL LEVEL   |       |        |       |         |                   |        |      |         |
| Low                 | 3.65  | 2.65   | 5.03  | <.0001  | 1.39              | 0.99   | 1.96 | 0.0562  |
| Medium              | 1.23  | 0.83   | 1.83  | 0.3015  | 1.11              | 0.75   | 1.66 | 0.6034  |
| High                | 1.00  |        |       |         | 1.00              |        |      |         |
| SEX                 |       |        |       |         |                   |        |      |         |
| Male                | 1.32  | 1.06   | 1.63  | 0.0117  | 1.80              | 1.45   | 2.24 | <.0001  |
| Female              | 1.00  |        |       |         | 1.00              |        |      |         |
| AGE CLASSES         |       |        |       |         |                   |        |      |         |
| 35-44               | 0.02  | 0.01   | 0.09  | <.0001  | 0.03              | 0.01   | 0.11 | <.0001  |
| 45-54               | 0.04  | 0.02   | 0.08  | <.0001  | 0.04              | 0.02   | 0.09 | <.0001  |
| 55-64               | 0.09  | 0.05   | 0.14  | <.0001  | 0.09              | 0.05   | 0.14 | <.0001  |
| 65-74               | 0.34  | 0.25   | 0.46  | <.0001  | 0.33              | 0.24   | 0.45 | <.0001  |
| 75-79               | 0.65  | 0.48   | 0.89  | 0.0066  | 0.64              | 0.47   | 0.87 | 0.0043  |
| 80+                 | 1.00  |        |       |         | 1.00              |        |      |         |
| JUNE-AUGUST         |       |        |       |         |                   |        |      |         |
| Unadjusted analysis |       |        |       |         | Adjusted analysis |        |      |         |
|                     | HR    | 95% CI |       | p-value | HR                | 95% CI |      | p-value |
| EDUCATIONAL LEVEL   |       |        |       |         |                   |        |      |         |
| Low                 | 5.52  | 1.67   | 18.22 | 0.0051  | 0.91              | 0.26   | 3.12 | 0.8748  |
| Medium              | 1.27  | 0.32   | 5.07  | 0.7378  | 1.07              | 0.27   | 4.34 | 0.9211  |
| High                | 1.00  |        |       |         | 1.00              |        |      |         |
| SEX                 |       |        |       |         |                   |        |      |         |
| Male                | 0.52  | 0.26   | 1.05  | 0.0694  | 0.56              | 0.81   | 0.40 | 0.3396  |
| Female              | 1.00  |        |       |         | 1.00              |        |      |         |
| AGE CLASSES         |       |        |       |         |                   |        |      |         |
| 35-44               |       |        |       |         |                   |        |      |         |



|              |       |       |       |        |       |       |       |        |
|--------------|-------|-------|-------|--------|-------|-------|-------|--------|
| <b>45-54</b> | 0.013 | 0.002 | 0.099 | <.0001 | 0.013 | 0.002 | 0.100 | <.0001 |
| <b>55-64</b> |       |       |       |        |       |       |       |        |
| <b>65-74</b> | 0.149 | 0.052 | 0.427 | 0.0004 | 0.151 | 0.052 | 0.440 | 0.0005 |
| <b>75-79</b> | 0.390 | 0.149 | 1.019 | 0.0546 | 0.395 | 0.149 | 1.044 | 0.061  |
| <b>80+</b>   | 1.00  |       |       |        | 1.00  |       |       |        |

#### SEPTEMBER-DECEMBER

|                          | Unadjusted analysis |        |         |        | Adjusted analysis |        |         |        |
|--------------------------|---------------------|--------|---------|--------|-------------------|--------|---------|--------|
|                          | HR                  | 95% CI | p-value |        | HR                | 95% CI | p-value |        |
| <b>EDUCATIONAL LEVEL</b> |                     |        |         |        |                   |        |         |        |
| <b>Low</b>               | 3.79                | 3.21   | 4.47    | <.0001 | 1.43              | 1.21   | 1.69    | <.0001 |
| <b>Medium</b>            | 1.12                | 0.92   | 1.35    | 0.2566 | 1.18              | 0.97   | 1.42    | 0.0942 |
| <b>High</b>              | 1.00                |        |         |        | 1.00              |        |         |        |
| <b>SEX</b>               |                     |        |         |        |                   |        |         |        |
| <b>Male</b>              | 1.49                | 1.35   | 1.64    | <.0001 | 1.98              | 1.79   | 2.18    | <.0001 |
| <b>Female</b>            | 1.00                |        |         |        | 1.00              |        |         |        |
| <b>AGE CLASSES</b>       |                     |        |         |        |                   |        |         |        |
| <b>35-44</b>             | 0.004               | 0.002  | 0.008   | <.0001 | 0.004             | 0.002  | 0.009   | <.0001 |
| <b>45-54</b>             | 0.012               | 0.009  | 0.017   | <.0001 | 0.013             | 0.009  | 0.018   | <.0001 |
| <b>55-64</b>             | 0.045               | 0.037  | 0.055   | <.0001 | 0.044             | 0.036  | 0.053   | <.0001 |
| <b>65-74</b>             | 0.233               | 0.205  | 0.265   | <.0001 | 0.217             | 0.191  | 0.248   | <.0001 |
| <b>75-79</b>             | 0.469               | 0.407  | 0.539   | <.0001 | 0.435             | 0.378  | 0.501   | <.0001 |
| <b>80+</b>               | 1.00                |        |         |        | 1.00              |        |         |        |

\*Adjusted for age and sex. p-value after Bonferroni adjustment for multiple comparison.
